# Supplementary material for: Distinctive populations of CD4+T cells associated with vaccine efficacy
Source: PubMed Central journal article supplement — iScience. 2022 Aug 13;25(9):104934. doi: 10.1016/j.isci.2022.104934 (PMC9436750; doi:10.1016/j.isci.2022.104934), 2022-08-13
Supplement: mmc1.pdf [file mmc1.pdf]

**iScience, Volume 25**

**Supplemental information**

**Distinctive populations of CD4<sup>+</sup>T cells  
associated with vaccine efficacy**

**Therese Woodring, Colin N. Dewey, Lucas Dos Santos Dias, Xin He, Hannah E. Dobson, Marcel Wüthrich, and Bruce Klein**

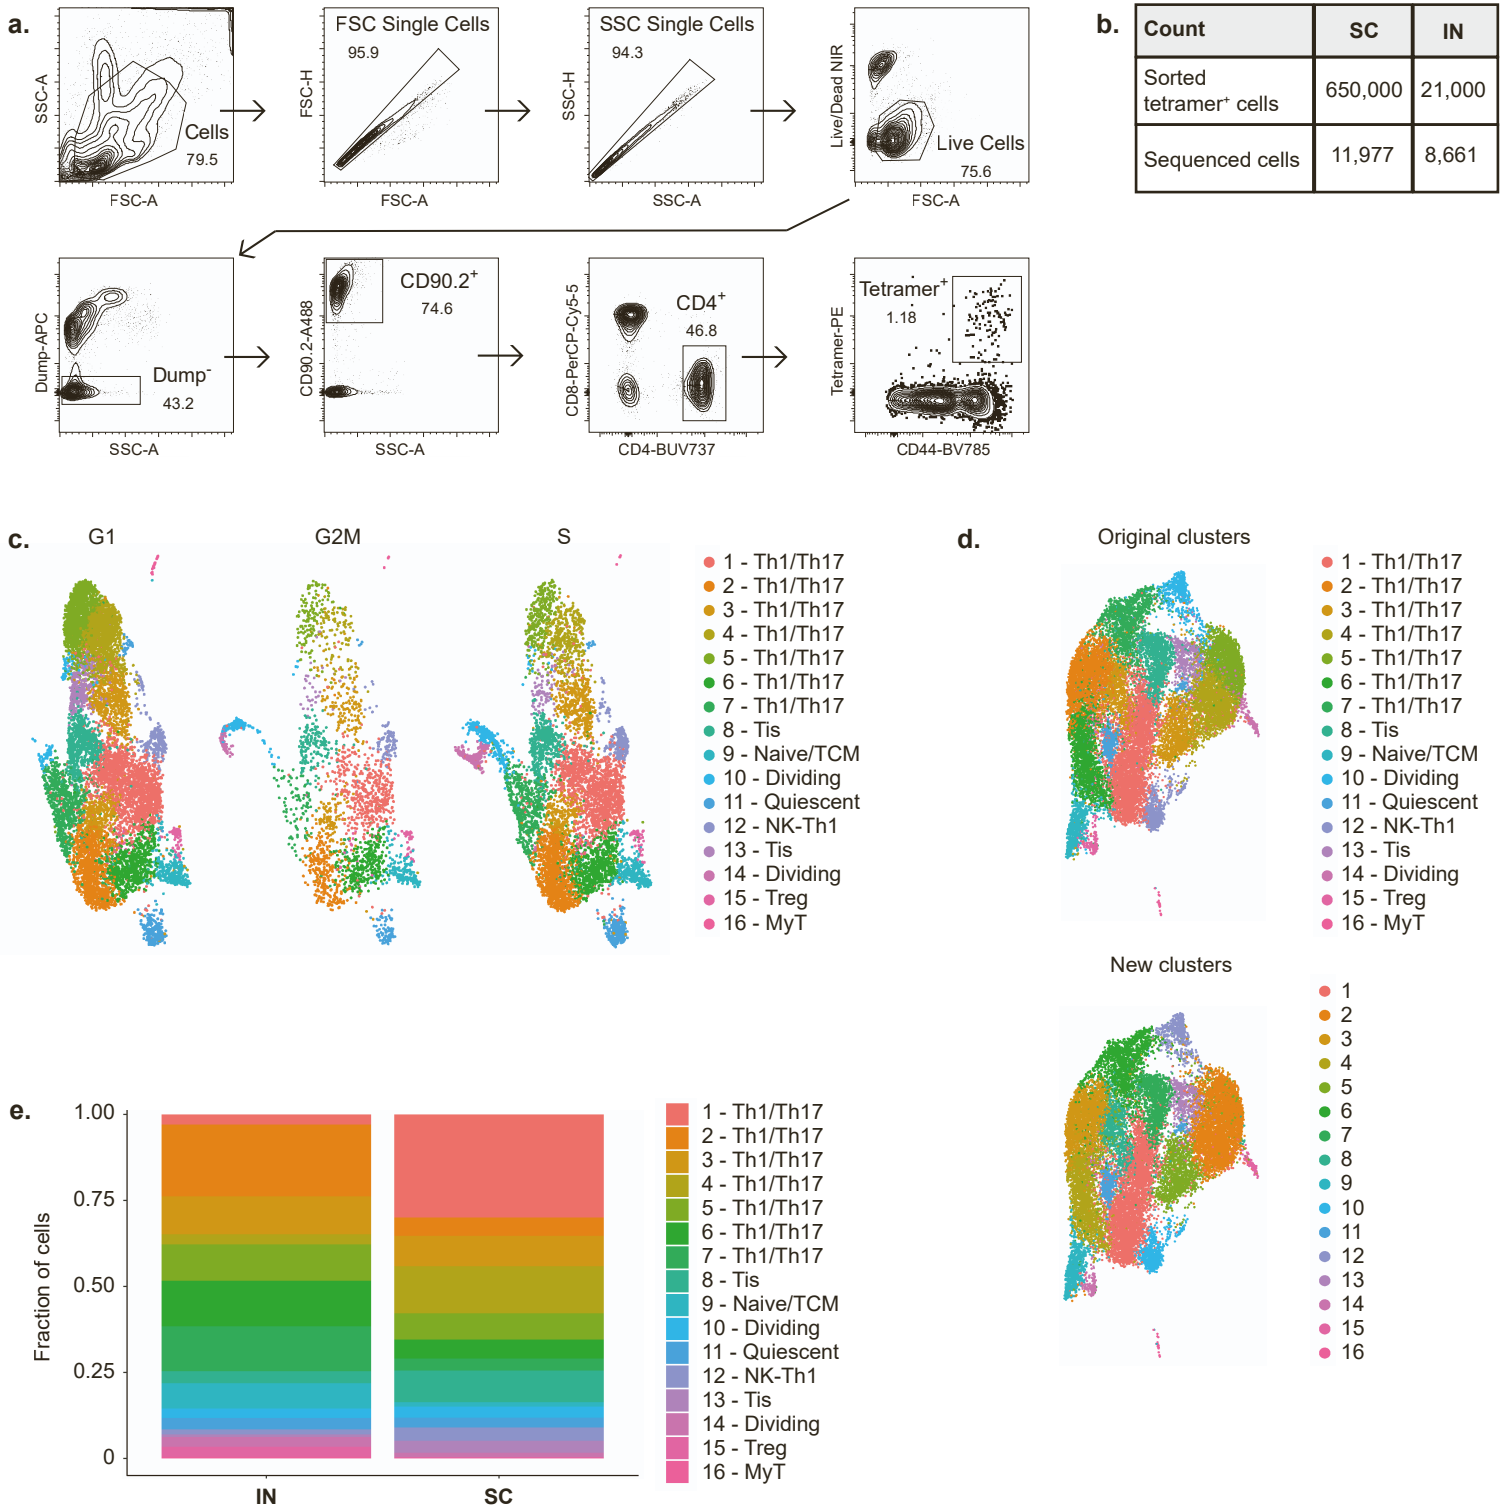

**Supplemental Figure 1, related to Figure 3.**

**Cellular data and cluster assignment for scRNAseq.** (a) Flow cytometry plots for selection of tetramer+ CD4+ T cells from IN sample. (b) Counts of sorted and sequenced tetramer-positive CD4+ cells from SC and IN samples. (c) UMAP for cell cycle phases. Cells in all stages are distributed across all clusters. (d) UMAP after regression of cell cycle genes shows cohesive clusters with both the original cluster assignments prior to regression (top) and new cluster assignments after regression (bottom). (e) Stacked bar plot depicting relative abundance of each cluster within the IN and SC groups.

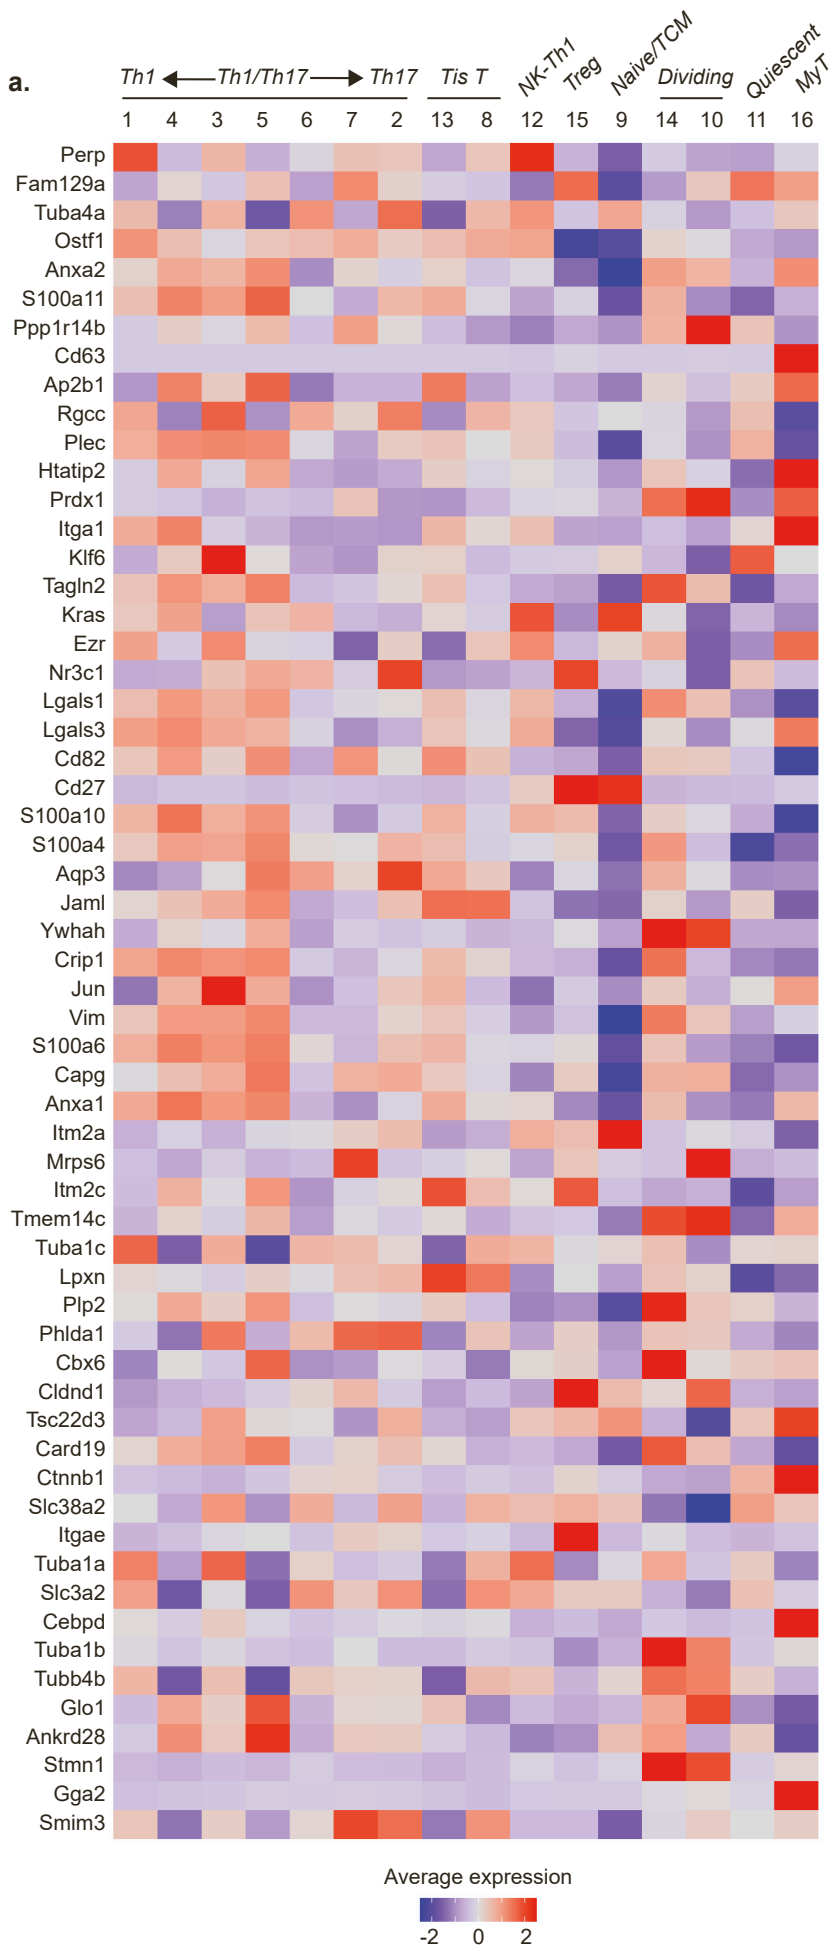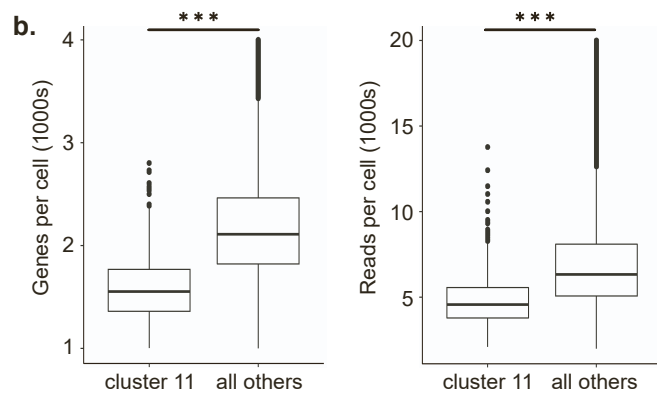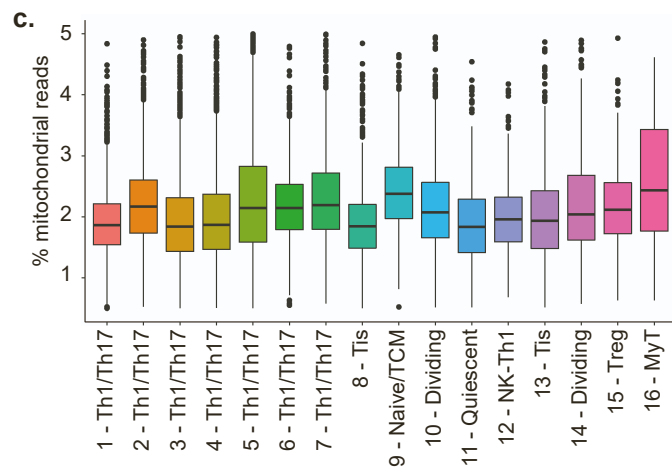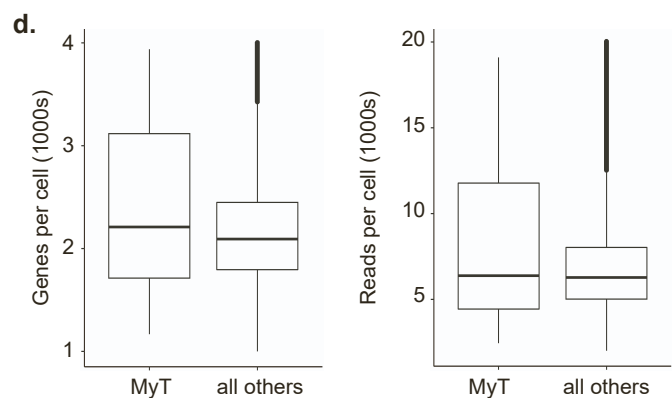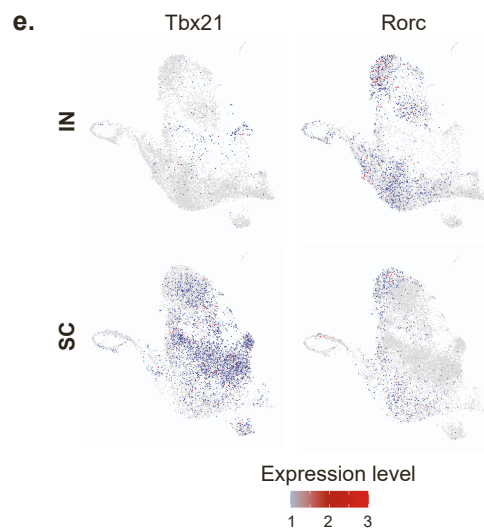

**Supplemental Figure 2, related to Figure 3.**

**Cluster abundance and gene expression between SC and IN vaccinated mice.** (a) Heatmap showing average expression of tissue-associated memory T cell genes involved in cytoskeleton, cell matrix, membrane scaffolding and adhesion. Gene list adapted from Szabo et al. (Szabo et al., 2019). The cluster with conspicuous downregulation of these tissue-associated genes corresponds to the n-äive/TCM population (cluster 9). (b) Comparison of the number of detected genes and reads in quiescent cells (cluster 11) compared to other clusters. Both were significantly lower in cluster 11 cells (genes,  $P=1.5 \times 10^{-174}$ ; reads,  $P=6.1 \times 10^{-103}$ ). P-values generated with Mann-Whitney test (\*\*\*) =  $P < 0.001$ ). (c) Less than 5% of reads mapped to mitochondrial genes across all clusters. Cluster 11 cells were comparable to other clusters for percent mitochondrial reads. (d) Comparison of the number of detected genes and reads in myeloid-like T cells (MyT, cluster 16) compared to other clusters. There was no significant increase in gene or read counts to suggest doublets within this population (genes,  $P=0.17$ ; reads,  $P=0.39$ ). P-values generated with Mann-Whitney test. (e) UMAP for Th1 transcription factor Tbx21 (Tbet) and Th17 transcription factor Rorc (ROR $\gamma$ t).

**a.**

| Sample | Total $\alpha\beta$ T cells analyzed | # cells with $\alpha$ chain call | # cells with $\beta$ chain call | # cells with both chains called |
|--------|--------------------------------------|----------------------------------|---------------------------------|---------------------------------|
| IN     | 2421                                 | 1880                             | 735                             | 212                             |
| SC     | 2619                                 | 1933                             | 822                             | 173                             |

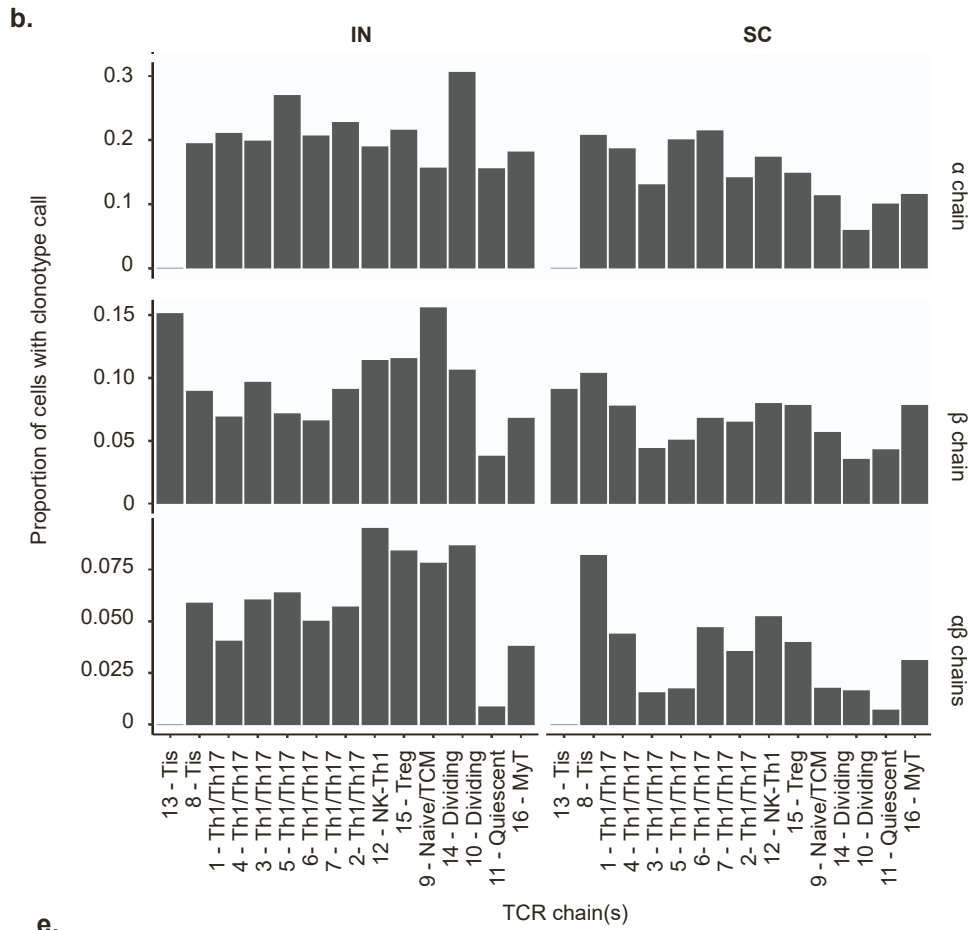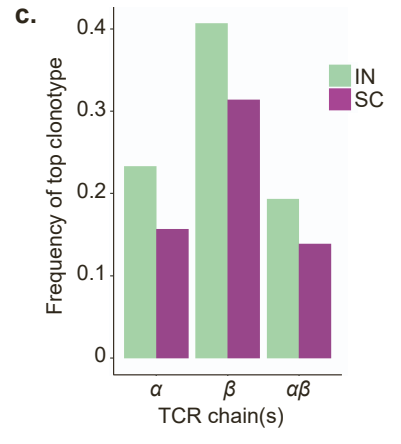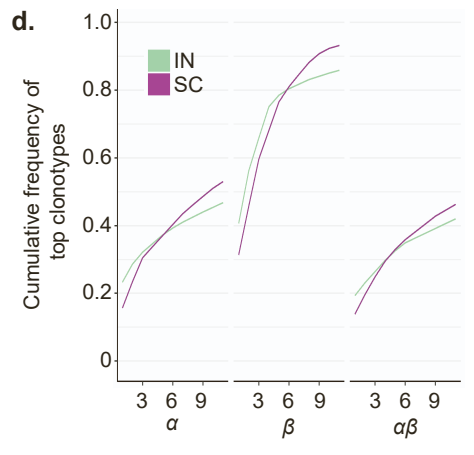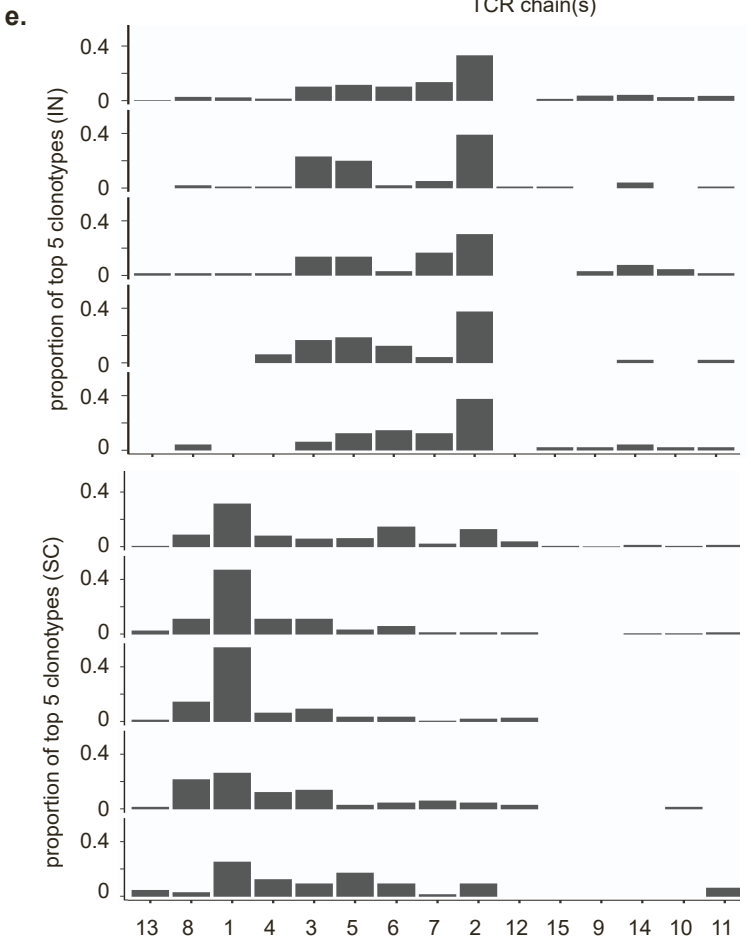

**Supplemental Figure 3, related to Figure 4.**  
**TCR clonotype diversity in IN and SC vaccinated mice.** (a) Total cells with  $\alpha$ ,  $\beta$ , or  $\alpha\beta$  TCR clonotype calls using TRUST4 in IN and SC samples. (b) Proportion of cells within each cluster with an  $\alpha$ ,  $\beta$ , or  $\alpha\beta$  TCR clonotype call. (c) Frequency of the most abundant  $\alpha$ ,  $\beta$ , or  $\alpha\beta$  TCR clonotype was higher IN than SC groups. (d) Cumulative frequency of the top  $\alpha$ ,  $\beta$ , or  $\alpha\beta$  TCR clonotypes. (e) The proportion of the 5 most abundant TCR  $\alpha$ -chain clonotypes within each cluster.

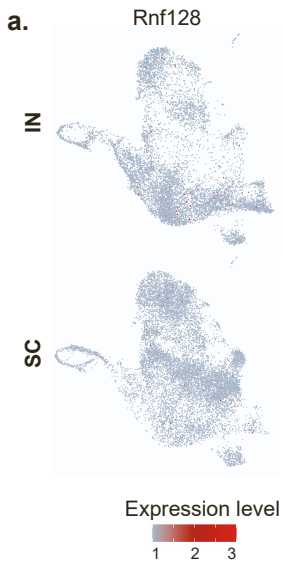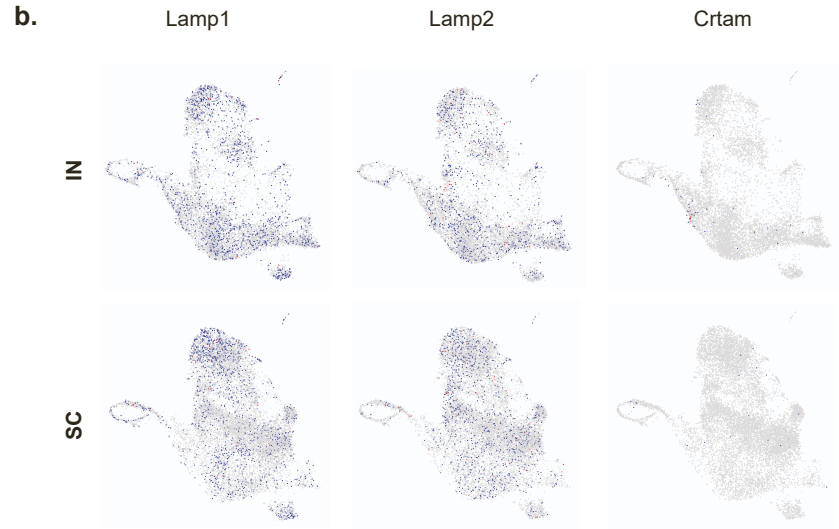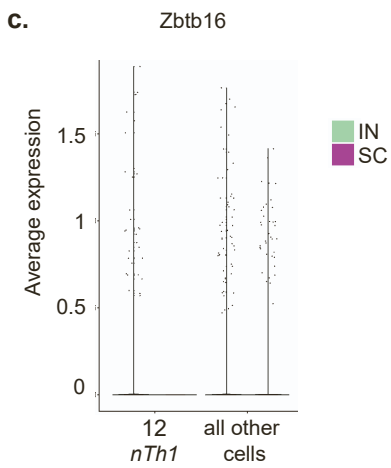

**Supplemental Figure 4, related to Figure 5.**

Tregs and NK-like Th1 cells in IN and SC vaccinated mice. (a) UMAP for expression of T cell anergy gene Rnf128 (GRAIL), separated by IN and SC samples. (b) Violin plot showing lack of expression of innate-like T cell gene Zbtb16 (PZLF) in NK-like Th1 and all other cells.

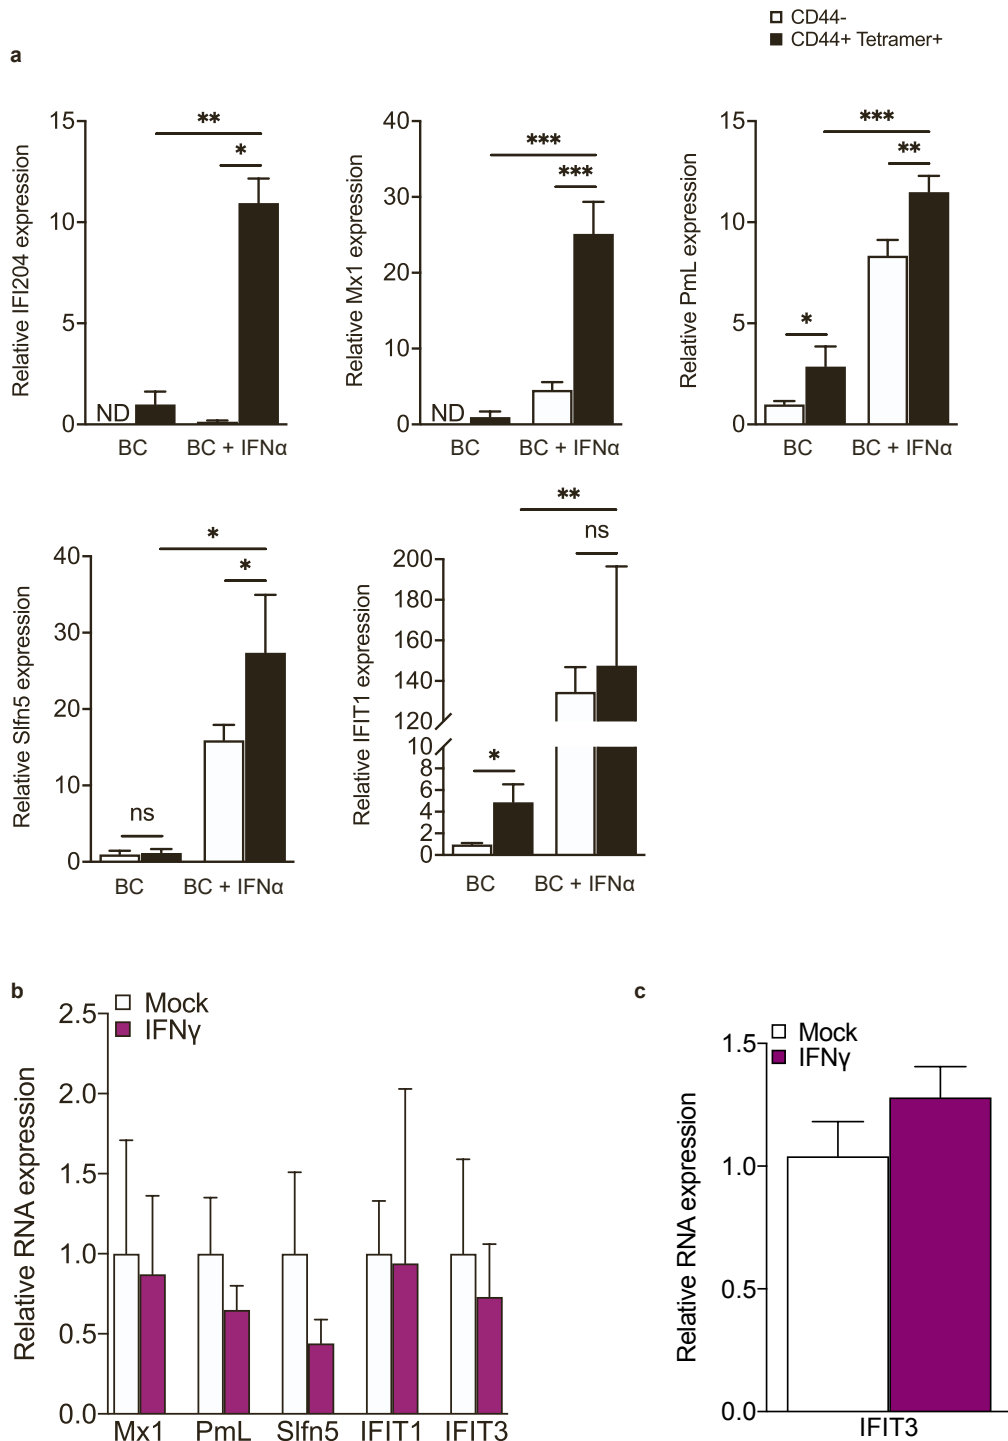

**Supplemental Figure 5, related to Figure 7.**

**RT-PCR Tis T cell signature.** (a) Quantitative reverse transcriptase PCR (RT-qPCR) detects increased expression of Tis T cell marker genes (*Ifi204*, *Mx1*, *Pml*, *Slfn5*, *Ifit1*) in tetramer-positive, CD44-positive (black) cells compared to control CD44-negative (white) cells from the spleen of *Blastomyces*-challenged, subcutaneously vaccinated mice. The addition of IFN $\alpha$  increased expression of these genes in both tetramer-positive and control cells. (b) RT-qPCR for Tis T cell marker genes in tetramer-positive, CD44-positive cells from the spleen of *Blastomyces*-challenged, subcutaneously vaccinated mice do not increase 12h after IFN $\gamma$  stimulation compared to those left unstimulated (Mock). (c) RT-qPCR for *Ifit3* in tetramer-positive, CD44-positive cells from the lungs of *Blastomyces*-challenged, subcutaneously vaccinated mice do not increase 12h after IFN $\gamma$  stimulation compared to those left unstimulated (Mock). The data in panels above were analyzed by two-tailed Student's t-test. Data are from one representative experiment of three performed and displayed as the mean  $\pm$  SEM. \* $p < 0.05$ ; \*\* $p < 0.01$ ; \*\*\* $p < 0.001$ .

| Cluster      | All cells     | Percent (All) | IN          | Percent (IN) | SC            | Percent (SC) |
|--------------|---------------|---------------|-------------|--------------|---------------|--------------|
| 1            | 3842          | 18.6%         | 254         | 2.9%         | 3588          | 30.0%        |
| 2            | 2453          | 11.9%         | 1807        | 20.9%        | 646           | 5.4%         |
| 3            | 2005          | 9.7%          | 956         | 11.0%        | 1049          | 8.8%         |
| 4            | 1910          | 9.3%          | 259         | 3.0%         | 1651          | 13.8%        |
| 5            | 1829          | 8.9%          | 916         | 10.6%        | 913           | 7.6%         |
| 6            | 1799          | 8.7%          | 1143        | 13.2%        | 656           | 5.5%         |
| 7            | 1556          | 7.5%          | 1133        | 13.1%        | 423           | 3.5%         |
| 8            | 1394          | 6.8%          | 301         | 3.5%         | 1093          | 9.1%         |
| 9            | 795           | 3.9%          | 636         | 7.3%         | 159           | 1.3%         |
| 10           | 632           | 3.1%          | 242         | 2.8%         | 390           | 3.3%         |
| 11           | 627           | 3.0%          | 285         | 3.3%         | 342           | 2.9%         |
| 12           | 577           | 2.8%          | 125         | 1.4%         | 452           | 3.8%         |
| 13           | 485           | 2.4%          | 65          | 0.8%         | 420           | 3.5%         |
| 14           | 416           | 2.0%          | 253         | 2.9%         | 163           | 1.4%         |
| 15           | 274           | 1.3%          | 253         | 2.9%         | 21            | 0.2%         |
| 16           | 44            | 0.2%          | 33          | 0.4%         | 11            | 0.1%         |
| <b>Total</b> | <b>20,638</b> | <b>100%</b>   | <b>8661</b> | <b>100%</b>  | <b>11,977</b> | <b>100%</b>  |

**Supplemental Table 1, related to Fig. 1.** Number and percent of cells in each cluster overall (All cells) and in intranasally vaccinated (IN) and subcutaneously vaccinated (SC) mice.



| gene symbol   | avg_log2FC | pct.SC | pct.IN | gene symbol | avg_log2FC | pct.SC | pct.IN |
|---------------|------------|--------|--------|-------------|------------|--------|--------|
| Il17a         | -2.939     | 0.166  | 0.71   | Nkg7        | 1.944      | 0.668  | 0.118  |
| Il17f         | -1.876     | 0.062  | 0.398  | Rps17       | -0.532     | 0.92   | 0.972  |
| Il18rap       | 0.858      | 0.532  | 0.208  | Ifitm2      | 1.788      | 0.437  | 0.047  |
| Ctla4         | -1.262     | 0.483  | 0.75   | Ifitm3      | 2.028      | 0.453  | 0.04   |
| Ramp1         | -1.120     | 0.396  | 0.709  | Ifngr1      | 0.595      | 0.919  | 0.823  |
| Rgs1          | -0.875     | 0.908  | 0.983  | Rps12       | -0.406     | 0.998  | 0.999  |
| Rgs16         | -1.117     | 0.217  | 0.472  | Lilr4b      | 0.859      | 0.429  | 0.175  |
| Vim           | 0.685      | 0.988  | 0.939  | Rps15       | -0.640     | 0.981  | 0.996  |
| Rpl12         | -0.549     | 0.995  | 0.998  | Gadd45b     | -0.961     | 0.745  | 0.88   |
| Itga4         | -1.062     | 0.246  | 0.659  | Ifng        | 2.193      | 0.63   | 0.142  |
| AA467197      | 1.762      | 0.73   | 0.164  | Rps26       | -0.449     | 0.996  | 0.998  |
| Atp8b4        | 0.707      | 0.345  | 0.04   | Dusp4       | -1.012     | 0.118  | 0.496  |
| Dusp2         | 1.303      | 0.77   | 0.604  | Uba52       | -0.361     | 0.982  | 0.996  |
| 1110034G24Rik | -0.528     | 0.065  | 0.277  | Junb        | -0.632     | 0.979  | 0.996  |
| Pmepa1        | -0.653     | 0.194  | 0.471  | Znrf1       | -0.665     | 0.605  | 0.817  |
| Ar            | -0.551     | 0.153  | 0.386  | Gabarapl2   | 0.576      | 0.898  | 0.793  |
| Car5b         | 0.579      | 0.319  | 0.077  | Itgb1       | 1.457      | 0.909  | 0.582  |
| Sema4a        | 0.594      | 0.374  | 0.113  | Lgals3      | 1.996      | 0.81   | 0.284  |
| S100a13       | 0.572      | 0.916  | 0.823  | Dnajc15     | 1.188      | 0.799  | 0.427  |
| S100a6        | 0.915      | 0.973  | 0.86   | Epsti1      | 1.277      | 0.759  | 0.345  |
| S100a10       | 0.787      | 0.992  | 0.966  | Rps25       | -0.362     | 0.99   | 0.997  |
| Cd2           | 0.645      | 0.889  | 0.753  | Nptn        | 0.740      | 0.65   | 0.377  |
| Csf1          | 0.690      | 0.266  | 0.035  | Rplp1       | -0.506     | 0.999  | 1      |
| Rps20         | -0.423     | 0.998  | 0.999  | Nt5e        | -1.121     | 0.155  | 0.571  |
| Tox           | -0.772     | 0.058  | 0.375  | Chst2       | -0.586     | 0.098  | 0.343  |
| Rps8          | -0.308     | 0.999  | 1      | Gpx1        | -0.856     | 0.62   | 0.834  |
| Sh3bgrl3      | 0.678      | 0.993  | 0.972  | Ccr4        | -0.547     | 0.053  | 0.284  |
| Rcc2          | -0.676     | 0.412  | 0.644  | Cxcr6       | 0.701      | 0.881  | 0.674  |
| Fosl2         | -0.784     | 0.41   | 0.655  | Ccr2        | 0.900      | 0.69   | 0.327  |
| Arap2         | 0.626      | 0.66   | 0.435  | Ramp3       | -0.708     | 0.11   | 0.354  |
| Rpl5          | -0.548     | 0.989  | 0.997  | Hs3st3b1    | 0.530      | 0.294  | 0.083  |
| Selplg        | 0.604      | 0.876  | 0.736  | Rpl23a      | -0.461     | 0.969  | 0.988  |
| Ndufa4        | -0.893     | 0.468  | 0.801  | Ccl5        | 2.212      | 0.327  | 0.071  |
| 1810058I24Rik | 0.697      | 0.709  | 0.5    | Hlf         | -0.931     | 0.113  | 0.45   |
| Zyx           | 0.768      | 0.581  | 0.306  | Tbx21       | 0.841      | 0.397  | 0.052  |
| Arl6ip5       | 0.724      | 0.842  | 0.662  | Ikzf3       | -1.184     | 0.153  | 0.597  |
| Slc2a3        | 0.727      | 0.488  | 0.198  | Gna13       | -0.812     | 0.769  | 0.912  |
| Klrd1         | 1.109      | 0.339  | 0.04   | Timp2       | -0.473     | 0.103  | 0.319  |
| Klrk1         | 1.137      | 0.552  | 0.15   | Serpinb9    | 0.692      | 0.313  | 0.097  |
| Klrc2         | 0.842      | 0.313  | 0.016  | Odc1        | -0.732     | 0.811  | 0.935  |
| Klrc1         | 1.344      | 0.479  | 0.026  | Ahr         | -0.605     | 0.104  | 0.354  |
| Ybx3          | 0.663      | 0.71   | 0.487  | Tspan13     | -0.813     | 0.255  | 0.588  |
| Kcnn4         | 0.662      | 0.694  | 0.471  | Rps29       | -0.335     | 1      | 1      |
| Zfp36         | -1.032     | 0.499  | 0.76   | Zfp36l1     | -0.753     | 0.758  | 0.893  |
| Fxyd5         | 0.584      | 0.976  | 0.949  | Fos         | -0.864     | 0.567  | 0.812  |

**Supplemental Table 2, related to Fig. 3.** Top differentially expressed genes in subcutaneously inoculated mice (SC) compared to intranasally inoculated mice (IN). All differences in expression are statistically significant ( $P < 0.01$ ). avg\_log2FC = average log2 fold change, where positive denotes genes upregulated SC. Pct.SC = percent of cells expressing gene SC. Pct.IN = percent of cells expressing gene IN.

| gene symbol | avg_log2FC | pct.Tis | pct.other | gene symbol    | avg_log2FC | pct.Tis | pct.other |
|-------------|------------|---------|-----------|----------------|------------|---------|-----------|
| Stat1       | 1.463588   | 0.874   | 0.43      | Dhx58          | 0.552192   | 0.271   | 0.034     |
| Sp100       | 1.021642   | 0.845   | 0.538     | Ifi35          | 0.956346   | 0.698   | 0.314     |
| Ifi206      | 1.364668   | 0.678   | 0.143     | Lgals3bp       | 1.005164   | 0.608   | 0.206     |
| Ifi214      | 1.158886   | 0.49    | 0.057     | Rnf213         | 1.640465   | 0.742   | 0.163     |
| Ifi213      | 1.474788   | 0.673   | 0.102     | Rsad2          | 1.154667   | 0.393   | 0.025     |
| Ifi209      | 1.280381   | 0.672   | 0.194     | Cmpk2          | 1.025174   | 0.437   | 0.046     |
| Ifi208      | 1.29585    | 0.605   | 0.12      | Ly6a           | 1.384124   | 0.957   | 0.654     |
| Ifi204      | 1.342273   | 0.426   | 0.025     | Rtp4           | 1.447903   | 0.635   | 0.068     |
| Mndal       | 1.548596   | 0.935   | 0.601     | Parp14         | 1.16424    | 0.624   | 0.203     |
| Ifi211      | 0.920783   | 0.309   | 0.043     | Dtx3l          | 0.876607   | 0.518   | 0.146     |
| Ifi203      | 1.643232   | 0.941   | 0.567     | Parp9          | 0.847324   | 0.507   | 0.13      |
| Ifih1       | 0.869165   | 0.407   | 0.061     | Mx1            | 0.997256   | 0.318   | 0.023     |
| B2m         | 0.671886   | 1       | 0.999     | H2-T23         | 0.947757   | 0.987   | 0.902     |
| Samhd1      | 1.457596   | 0.89    | 0.557     | Eif2ak2        | 0.607137   | 0.297   | 0.054     |
| Zbp1        | 1.701802   | 0.831   | 0.235     | AW112010       | 1.148043   | 0.988   | 0.867     |
| Gbp7        | 1.141752   | 0.65    | 0.229     | Ms4a4c         | 1.125778   | 0.44    | 0.099     |
| Gbp2        | 1.330516   | 0.529   | 0.141     | Ms4a4b         | 1.308764   | 0.972   | 0.758     |
| Ddx58       | 0.906377   | 0.54    | 0.158     | Ms4a6b         | 1.070097   | 0.972   | 0.789     |
| lsg15       | 2.651938   | 0.891   | 0.252     | Ifit3          | 1.700427   | 0.434   | 0.02      |
| Gbp9        | 0.653588   | 0.332   | 0.07      | Ifit1          | 1.757272   | 0.53    | 0.032     |
| Gbp6        | 0.927166   | 0.502   | 0.124     | Psmb8          | 0.797364   | 0.98    | 0.893     |
| Oasl2       | 0.964412   | 0.379   | 0.028     | Stat2          | 0.674791   | 0.383   | 0.098     |
| Oas3        | 0.925822   | 0.461   | 0.058     | Ube2l6         | 0.770356   | 0.356   | 0.089     |
| Trafd1      | 1.021619   | 0.578   | 0.18      | Psmb10         | 0.93669    | 0.79    | 0.461     |
| Samd9l      | 1.105671   | 0.72    | 0.339     | Slfm2          | 0.957202   | 0.92    | 0.696     |
| Herc6       | 1.191133   | 0.596   | 0.137     | Irf9           | 0.744718   | 0.542   | 0.201     |
| Usp18       | 0.842146   | 0.324   | 0.017     | Daxx           | 0.686932   | 0.388   | 0.109     |
| lsg20       | 1.766755   | 0.779   | 0.219     | Psme1          | 0.798974   | 0.944   | 0.782     |
| Trim30a     | 1.47597    | 0.761   | 0.21      | Gbp4           | 0.901133   | 0.565   | 0.226     |
| Trim30d     | 0.584551   | 0.266   | 0.04      | H2-T22         | 0.911738   | 0.836   | 0.586     |
| Ifitm3      | 2.196072   | 0.63    | 0.245     | H2-K1          | 0.49828    | 1       | 0.999     |
| Irf7        | 1.619405   | 0.811   | 0.229     | 9930111J21Rik2 | 0.925375   | 0.751   | 0.42      |
| Ddx60       | 0.655933   | 0.3     | 0.043     | Tapbp          | 0.888208   | 0.798   | 0.541     |
| Bst2        | 2.361482   | 0.96    | 0.521     | Parp10         | 0.597853   | 0.401   | 0.125     |
| Phf11b      | 1.275133   | 0.654   | 0.219     | Helz2          | 0.610078   | 0.371   | 0.11      |
| Epsti1      | 1.175369   | 0.898   | 0.554     | Chmp4b         | 0.756142   | 0.923   | 0.777     |
| Pml         | 0.653543   | 0.36    | 0.083     | Psme2          | 0.722376   | 0.897   | 0.714     |
| Shisa5      | 0.872388   | 0.994   | 0.942     | Sp110          | 0.807667   | 0.626   | 0.325     |
| Irgm1       | 1.015191   | 0.607   | 0.177     | H2-Q4          | 0.668293   | 0.966   | 0.844     |
| Ifi47       | 1.28474    | 0.726   | 0.266     | Trim12c        | 0.632304   | 0.373   | 0.123     |
| Igtp        | 1.217419   | 0.73    | 0.277     | Trim12a        | 0.723719   | 0.563   | 0.26      |
| Xaf1        | 1.258989   | 0.65    | 0.125     | H2-D1          | 0.394261   | 1       | 1         |
| Slfm5       | 2.008012   | 0.675   | 0.136     | Ogfr           | 0.639643   | 0.544   | 0.257     |
| Slfm8       | 0.983883   | 0.494   | 0.111     | Tap1           | 0.693251   | 0.741   | 0.472     |
| Slfm1       | 1.470985   | 0.75    | 0.227     | Nampt          | 0.518962   | 0.348   | 0.118     |

**Supplemental Table 3, related to Fig. 6.** Top differentially expressed genes between Tis T cells (combined cluster 8 and 13) and all other cells. All differences in expression are statistically significant ( $P < 0.01$ ). avg\_log2FC = average log2 fold change, where positive denotes genes upregulated in Tis T cells compared to other cells. Pct.Tis = percent of cells in clusters 8 & 13 expressing gene. Pct.other = percent of cells in remaining clusters expressing gene.

| gene symbol | avg_log2FC | pct.Tis.8 | pct.Tis.13 | gene symbol | avg_log2FC | pct.Tis.8 | pct.Tis.13 |
|-------------|------------|-----------|------------|-------------|------------|-----------|------------|
| H3f3b       | 1.736125   | 1         | 0.992      | Sqstm1      | 1.104345   | 0.808     | 0.381      |
| Junb        | 1.946537   | 1         | 0.948      | Nfkbid      | 1.15721    | 0.666     | 0.208      |
| Vps37b      | 2.251496   | 0.939     | 0.324      | Irf2bp2     | 0.955399   | 0.876     | 0.6        |
| Bhlhe40     | 2.005815   | 0.981     | 0.79       | Ptp4a1      | 1.018083   | 0.758     | 0.338      |
| Nfkbia      | 2.075163   | 0.995     | 0.808      | Ctla4       | 1.332767   | 0.7       | 0.268      |
| Pim1        | 1.994649   | 0.986     | 0.74       | Srgn        | 0.722013   | 0.999     | 0.973      |
| Tnfaip3     | 1.977649   | 0.958     | 0.48       | Coq10b      | 0.929079   | 0.793     | 0.359      |
| Odc1        | 2.346535   | 0.963     | 0.555      | Cxcr4       | 1.266615   | 0.639     | 0.198      |
| Pnrc1       | 1.484511   | 0.981     | 0.68       | Hif1a       | 0.998846   | 0.913     | 0.612      |
| Csrnp1      | 1.757204   | 0.877     | 0.247      | Hilpda      | 1.225128   | 0.496     | 0.072      |
| Ubc         | 1.303885   | 0.999     | 0.899      | Rrad        | 1.24763    | 0.679     | 0.254      |
| Kdm6b       | 1.875581   | 0.902     | 0.328      | Stk17b      | 0.821825   | 0.959     | 0.81       |
| Ifrd1       | 1.673152   | 0.918     | 0.439      | Bcl2a1d     | 1.063756   | 0.841     | 0.544      |
| Dusp5       | 1.559009   | 0.928     | 0.528      | Gadd45b     | 1.333962   | 0.91      | 0.637      |
| Btg1        | 1.071251   | 1         | 0.986      | Nfkbiz      | 1.015138   | 0.653     | 0.235      |
| Cdkn1a      | 1.759169   | 0.83      | 0.272      | Dnajb9      | 0.948277   | 0.613     | 0.186      |
| Rgs2        | 1.845596   | 0.925     | 0.526      | Zfp622      | 0.872833   | 0.728     | 0.313      |
| Nr4a1       | 1.766735   | 0.804     | 0.266      | Dennd4a     | 1.057691   | 0.791     | 0.41       |
| Zc3h12a     | 1.443751   | 0.758     | 0.192      | Sub1        | 0.718955   | 0.976     | 0.864      |
| Tgif1       | 1.413129   | 0.714     | 0.144      | Wsb1        | 0.844474   | 0.742     | 0.33       |
| Bcl2a1b     | 1.476229   | 0.938     | 0.658      | Fth1        | 0.624196   | 1         | 0.994      |
| Sh2d2a      | 1.393376   | 0.914     | 0.61       | Gpr183      | 1.041411   | 0.803     | 0.476      |
| Ubald2      | 1.533704   | 0.831     | 0.357      | Tnfrsf4     | 1.420604   | 0.605     | 0.221      |
| Ier5        | 1.233939   | 0.963     | 0.616      | Atf3        | 1.224609   | 0.627     | 0.233      |
| Srsf5       | 1.00658    | 0.981     | 0.771      | Ly6a        | -0.83014   | 0.949     | 0.981      |
| Gna13       | 1.362324   | 0.912     | 0.548      | Fosl2       | 1.00056    | 0.533     | 0.142      |
| Hspa5       | 1.019739   | 0.993     | 0.891      | Sdhaf1      | 0.989205   | 0.587     | 0.19       |
| Eif1        | 0.612944   | 1         | 0.994      | Dusp2       | 1.372155   | 0.859     | 0.604      |
| Rgs1        | 1.595625   | 0.961     | 0.808      | Mknk2       | 0.806657   | 0.808     | 0.449      |
| Ddx5        | 0.676566   | 1         | 0.981      | Skil        | 0.77867    | 0.933     | 0.672      |
| Tob1        | 1.164373   | 0.795     | 0.278      | Rinl        | -0.87748   | 0.573     | 0.802      |
| Smad7       | 1.081028   | 0.95      | 0.693      | Sertad1     | 0.808728   | 0.652     | 0.247      |
| Cish        | 1.082261   | 0.918     | 0.614      | Gramd3      | 1.019667   | 0.732     | 0.379      |
| Socs3       | 1.362927   | 0.707     | 0.212      | Birc2       | 0.801778   | 0.807     | 0.478      |
| Prdx6       | 1.057144   | 0.938     | 0.711      | Lmnb1       | 0.927639   | 0.734     | 0.357      |
| Zfp3612     | 1.328891   | 0.941     | 0.691      | Arl6ip1     | -0.7051    | 0.863     | 0.942      |
| Hist1h1c    | 1.982579   | 0.73      | 0.318      | Tubb4b      | 0.795374   | 0.83      | 0.507      |
| Rgcc        | 1.262302   | 0.896     | 0.538      | Ube2s       | 0.714336   | 0.881     | 0.623      |
| Ier2        | 1.064392   | 0.944     | 0.676      | Rora        | 0.850761   | 0.919     | 0.765      |
| Slc3a2      | 1.048187   | 0.877     | 0.53       | Ppp1r15a    | 0.802229   | 0.863     | 0.52       |
| Nr4a3       | 1.165843   | 0.628     | 0.151      | Arid5a      | 0.834068   | 0.702     | 0.322      |
| Gpr132      | 1.059531   | 0.828     | 0.431      | Vgll4       | 0.802229   | 0.761     | 0.406      |
| Arf4        | 0.89394    | 0.966     | 0.736      | Pde4b       | 0.911252   | 0.709     | 0.379      |
| Per1        | 1.036051   | 0.613     | 0.146      | Syt13       | 0.881117   | 0.788     | 0.458      |
| Zfp3611     | 1.050164   | 0.905     | 0.588      | Ccn1        | 0.774097   | 0.89      | 0.635      |

**Supplemental Table 4, related to Fig. 6.** Top differentially expressed genes between cluster 8 and cluster 13 Tis T cells. All differences in expression are statistically significant ( $P < 0.01$ ). avg\_log2FC = average log2 fold change, where positive denotes genes upregulated in cluster 8 compared to cluster 13. Pct.Tis.8 = percent of cells in cluster 8 expressing gene. Pct.Tis.13 = percent of cells in cluster 13 expressing gene.

| Cluster 8 Tis T cells | Cluster 13 Tis T cells |
|-----------------------|------------------------|
| Ifi213                | Epsti1                 |
| Stat2                 | Sp100                  |
| Parp14                | Nxpe3                  |
| Il18rap               | Rnf213                 |
| Serpinb9              | Smyd3                  |
| Gm4070                | Ddx60                  |
| Slfn1                 | Slco3a1                |
| Tnfrsf4               | Herc6                  |
| Ddx60                 | Skap1                  |
| Ptp4a2                | Samhd1                 |

**Supplemental Table 5, related to Fig. 6.** Genes with the most significantly different velocities in Tis T cells, identified from analysis of unspliced reads with Velocyto. The only gene that also appears among the top differentially expressed genes between cluster 8 and 13 is *Tnfrsf4*, which is already more highly expressed in cluster 8. Data shown for Tis T cell-enriched SC sample only.
